# Supplementary material for: Widespread and persistent ozone pollution in eastern China during the non-winter season of 2015: observations and source attributions
Source: Copernicus journal article supplement (doi:10.5194/acp-17-2759-2017), 2017-02-23
Supplement: Supplementary file 1 [file acp-17-2759-2017-supplement.pdf]

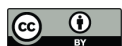

*Supplement of*

**Widespread and persistent ozone pollution in eastern China during the non-winter season of 2015: observations and source attributions**

**Guohui Li et al.**

*Correspondence to:* Guohui Li (ligh@ieecas.cn) and Junji Cao (jjcao@ieecas.cn)

The copyright of individual parts of the supplement might differ from the CC-BY 3.0 licence.

## Supplementary Information Section

The supplementary information (SI) provides description about the NO<sub>2</sub> simulations.

### Tables

Table S1 Emission rates of the major O<sub>3</sub> precursors from different emission sources in May in the simulation domain (Unit: 10<sup>6</sup> mole month<sup>-1</sup>).

| Species         | Source Types |                |             |
|-----------------|--------------|----------------|-------------|
|                 | Industry     | Transportation | Residential |
| ALK1            | 1199         | 57             | 237         |
| ALK2            | 1530         | 125            | 376         |
| ALK3            | 892          | 51             | 135         |
| ALK4            | 1190         | 284            | 142         |
| ALK5            | 1505         | 246            | 237         |
| ETHENE          | 1289         | 468            | 455         |
| OLE1            | 672          | 284            | 214         |
| OLE2            | 594          | 243            | 126         |
| ISOPRENE        | 4            | 1              | 5           |
| TERPENES        | 8            | 3              | 29          |
| ARO1            | 1989         | 132            | 136         |
| ARO2            | 1014         | 191            | 131         |
| HCHO            | 95           | 256            | 80          |
| RCHO            | 0            | 73             | 23          |
| NO <sub>x</sub> | 21652        | 8539           | 3293        |

### Supplementary Figure Captions

Fig. S1 Defined four sections in Eastern China. 1) Northeast China (NEC): Heilongjiang, Jilin, Liaoning, and the east part of Inner Mongolia, 2) North China Plain and surrounding areas (NCPs): Beijing, Tianjin, Hebei, Shandong, Henan, Shanxi, and the north part of Jiangsu and Anhui, 3) YRD and surrounding areas (YRDs): the south part of Jiangsu and Anhui, Shanghai, Zhejiang, and Hubei, and 4) PRD and surrounding areas (PRDs): Fujian, Jiangxi, Hunan, Guangxi, and Guangdong.

Fig. S2 Average geopotential height wind field on 500 hPa from 22 to 27 May 2015.

Fig. S3 Pattern comparison of simulated vs. observed near-surface  $\text{NO}_2$  at 08:00 BJT from 22 to 27 May 2015. Colored circles:  $\text{NO}_2$  observations; color contour:  $\text{NO}_2$  simulations; black arrows: simulated surface winds.

Fig. S4 Comparison of measured (black dots) and predicted (blue line) diurnal profiles of near-surface  $\text{NO}_2$  averaged over all ambient monitoring stations in provinces of Eastern China from 22 to 28 May 2015.

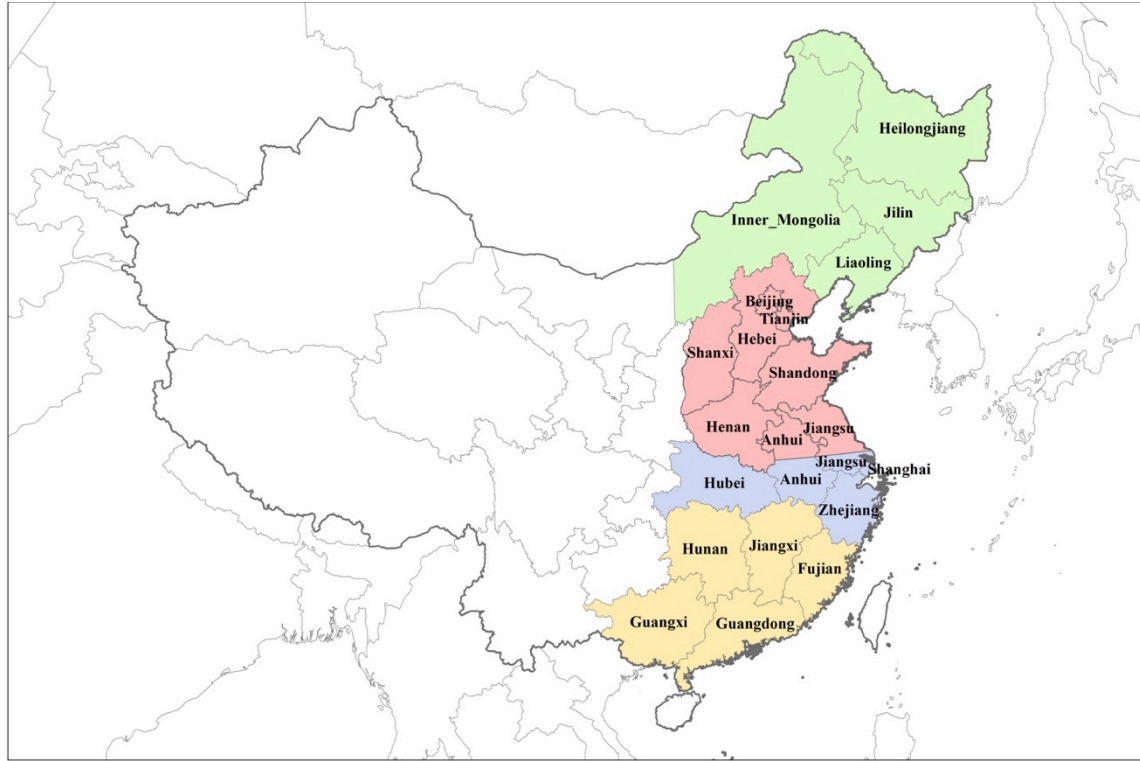

Fig. S1 Defined four sections in Eastern China. 1) Northeast China (NEC): Heilongjiang, Jilin, Liaoning, and the east part of Inner Mongolia; 2) North China Plain and surrounding areas (NCPs): Beijing, Tianjin, Hebei, Shandong, Henan, Shanxi, and the north part of Jiangsu and Anhui; 3) YRD and surrounding areas (YRDs): the south part of Jiangsu and Anhui, Shanghai, Zhejiang, and Hubei; and 4) PRD and surrounding areas (PRDs): Fujian, Jiangxi, Hunan, Guangxi, and Guangdong.

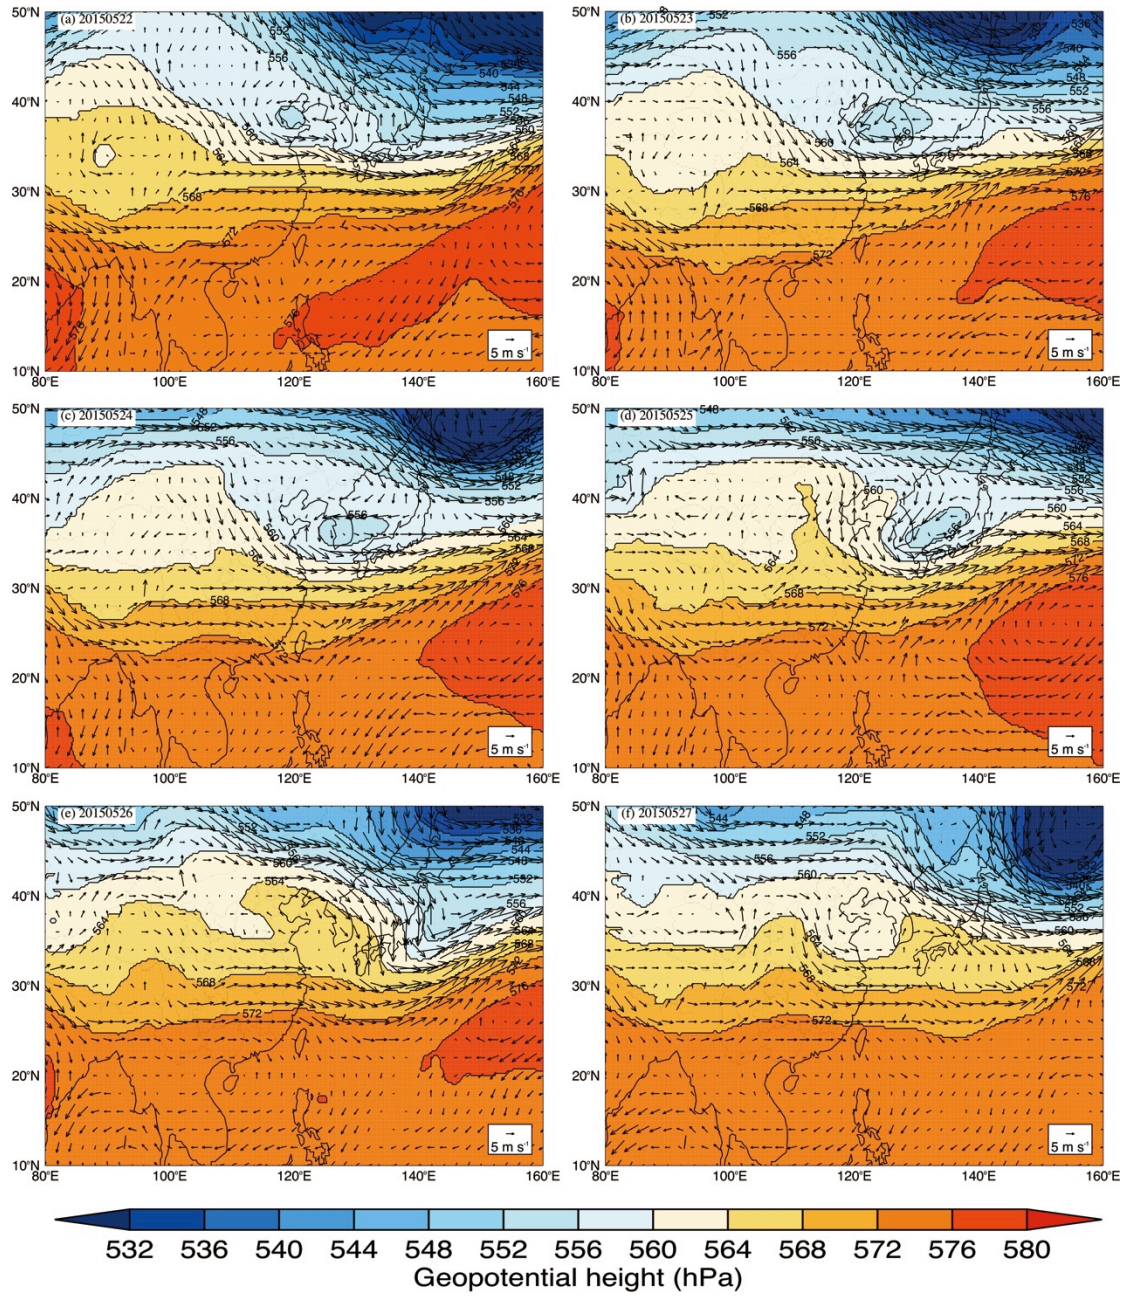

Fig. S2 Average geopotential height wind field on 500 hPa from 22 to 27 May 2015.



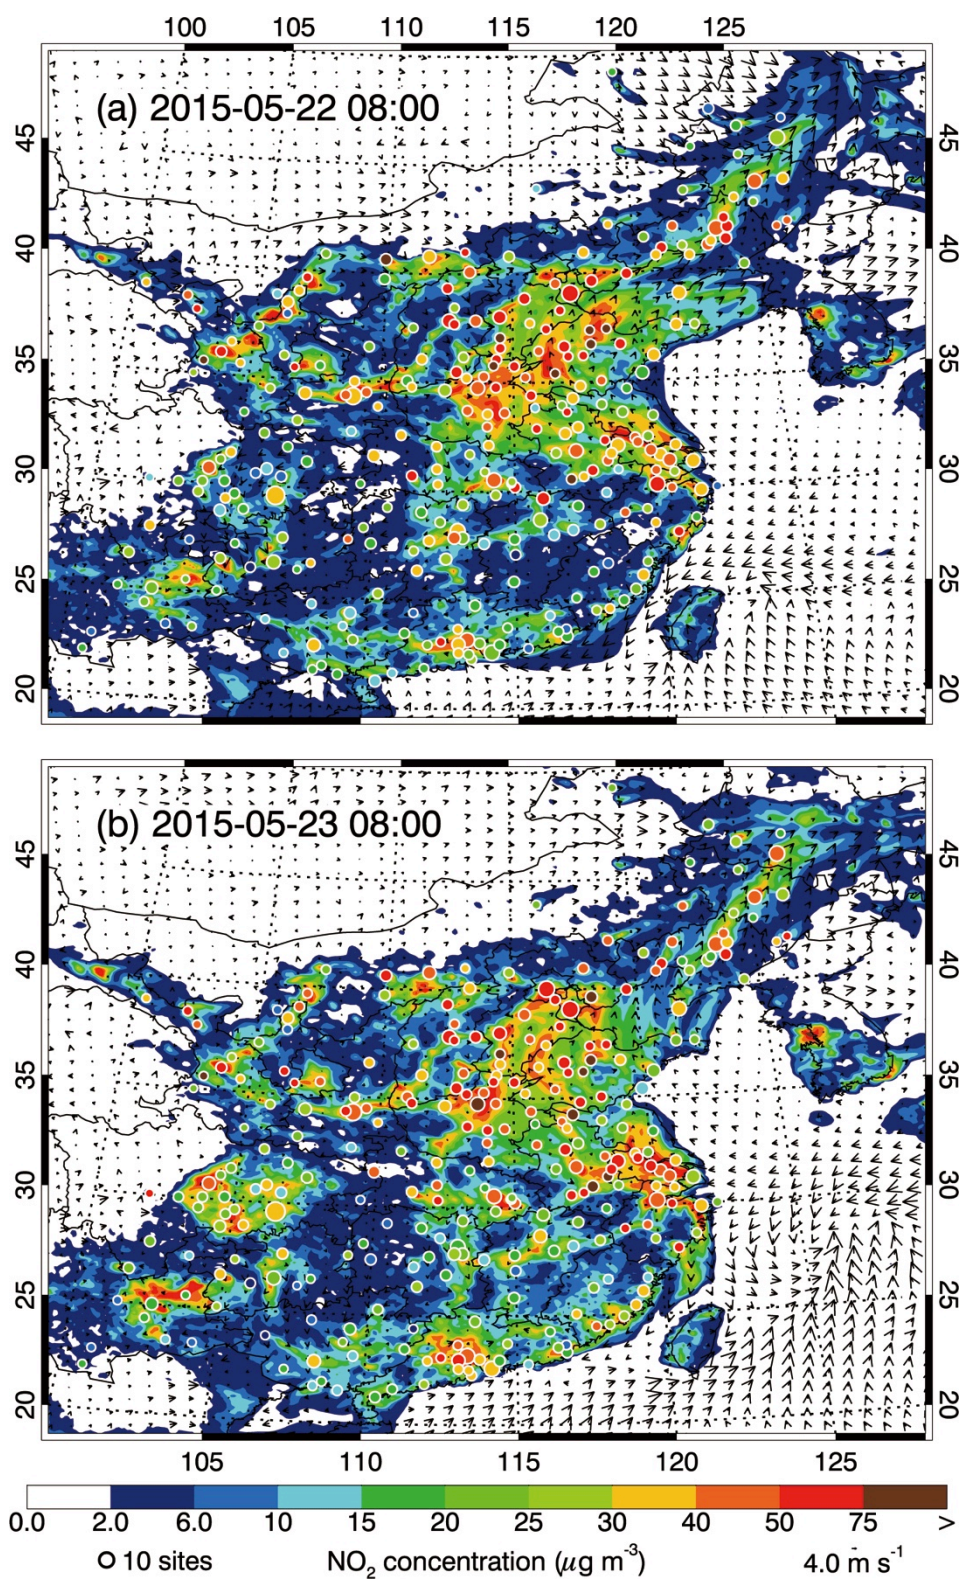

Fig. S3 Pattern comparison of simulated vs. observed near-surface  $\text{NO}_2$  at 08:00 BJT from 22 to 27 May 2015. Colored circles:  $\text{NO}_2$  observations; color contour:  $\text{NO}_2$  simulations; black arrows: simulated surface winds.



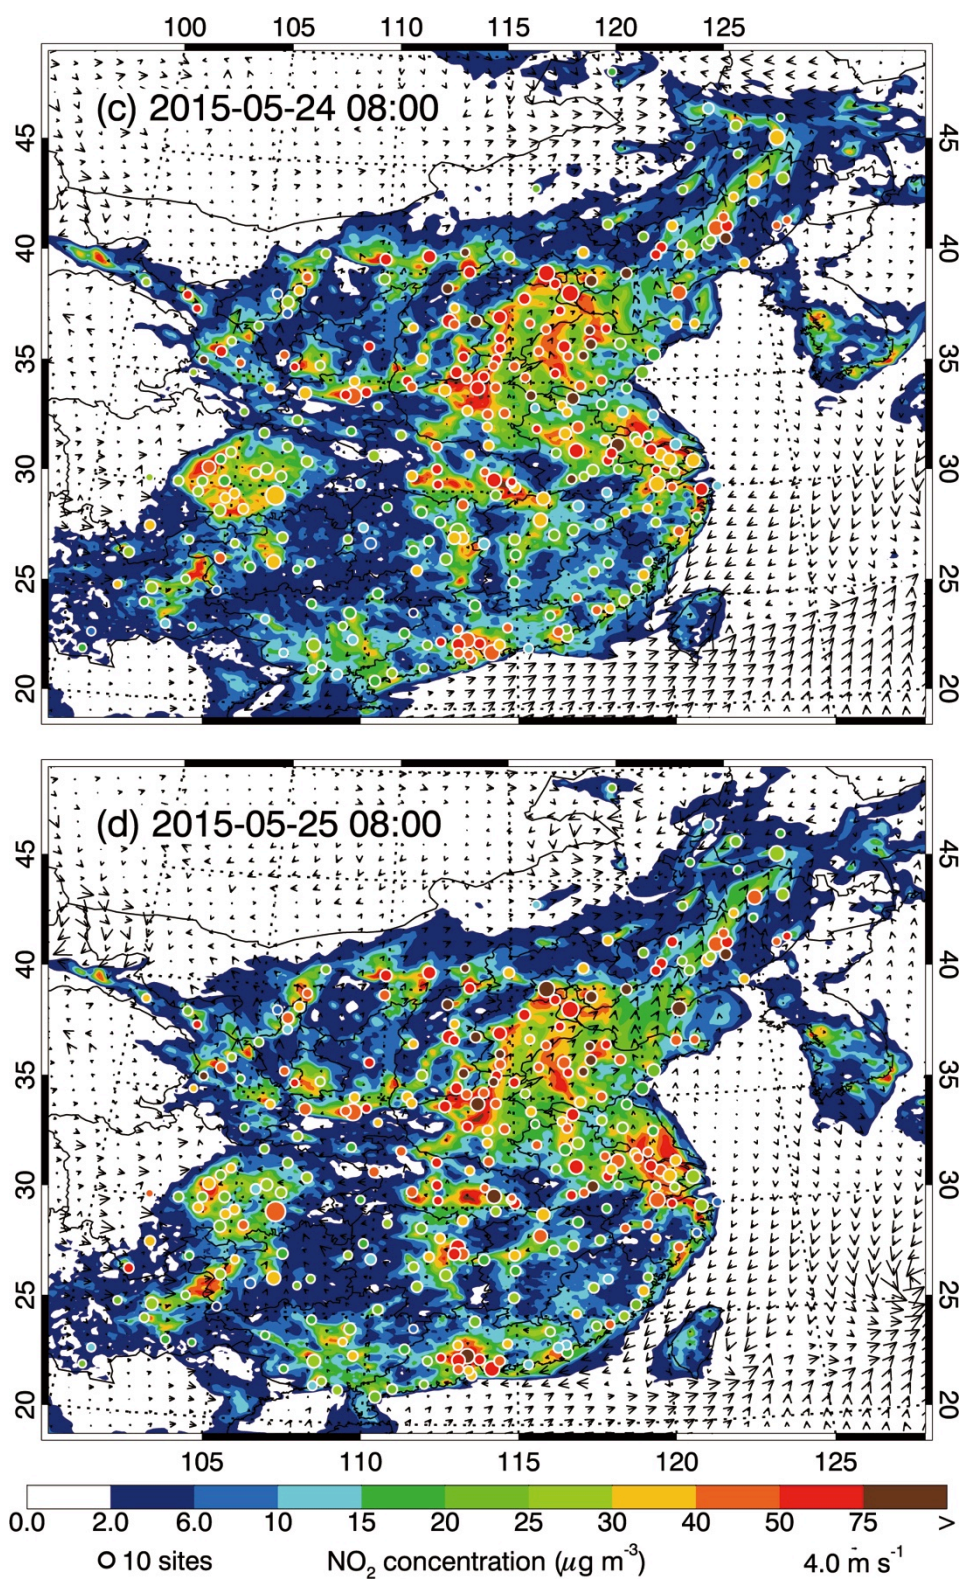

Fig. S3 Continued.



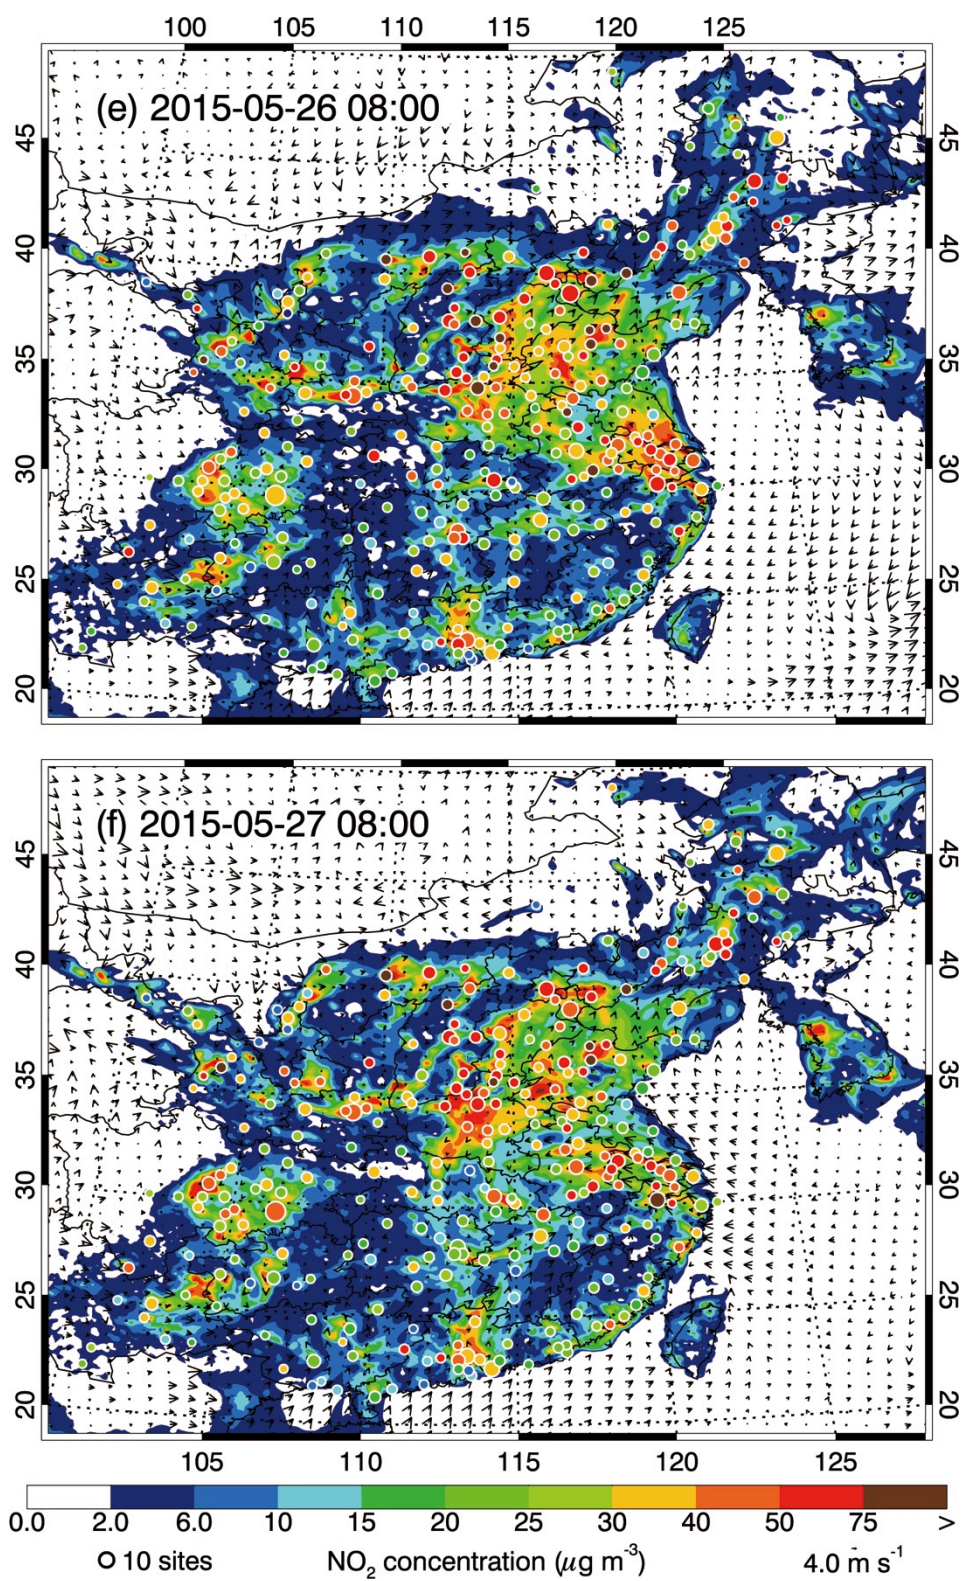

Fig. S3 Continued.



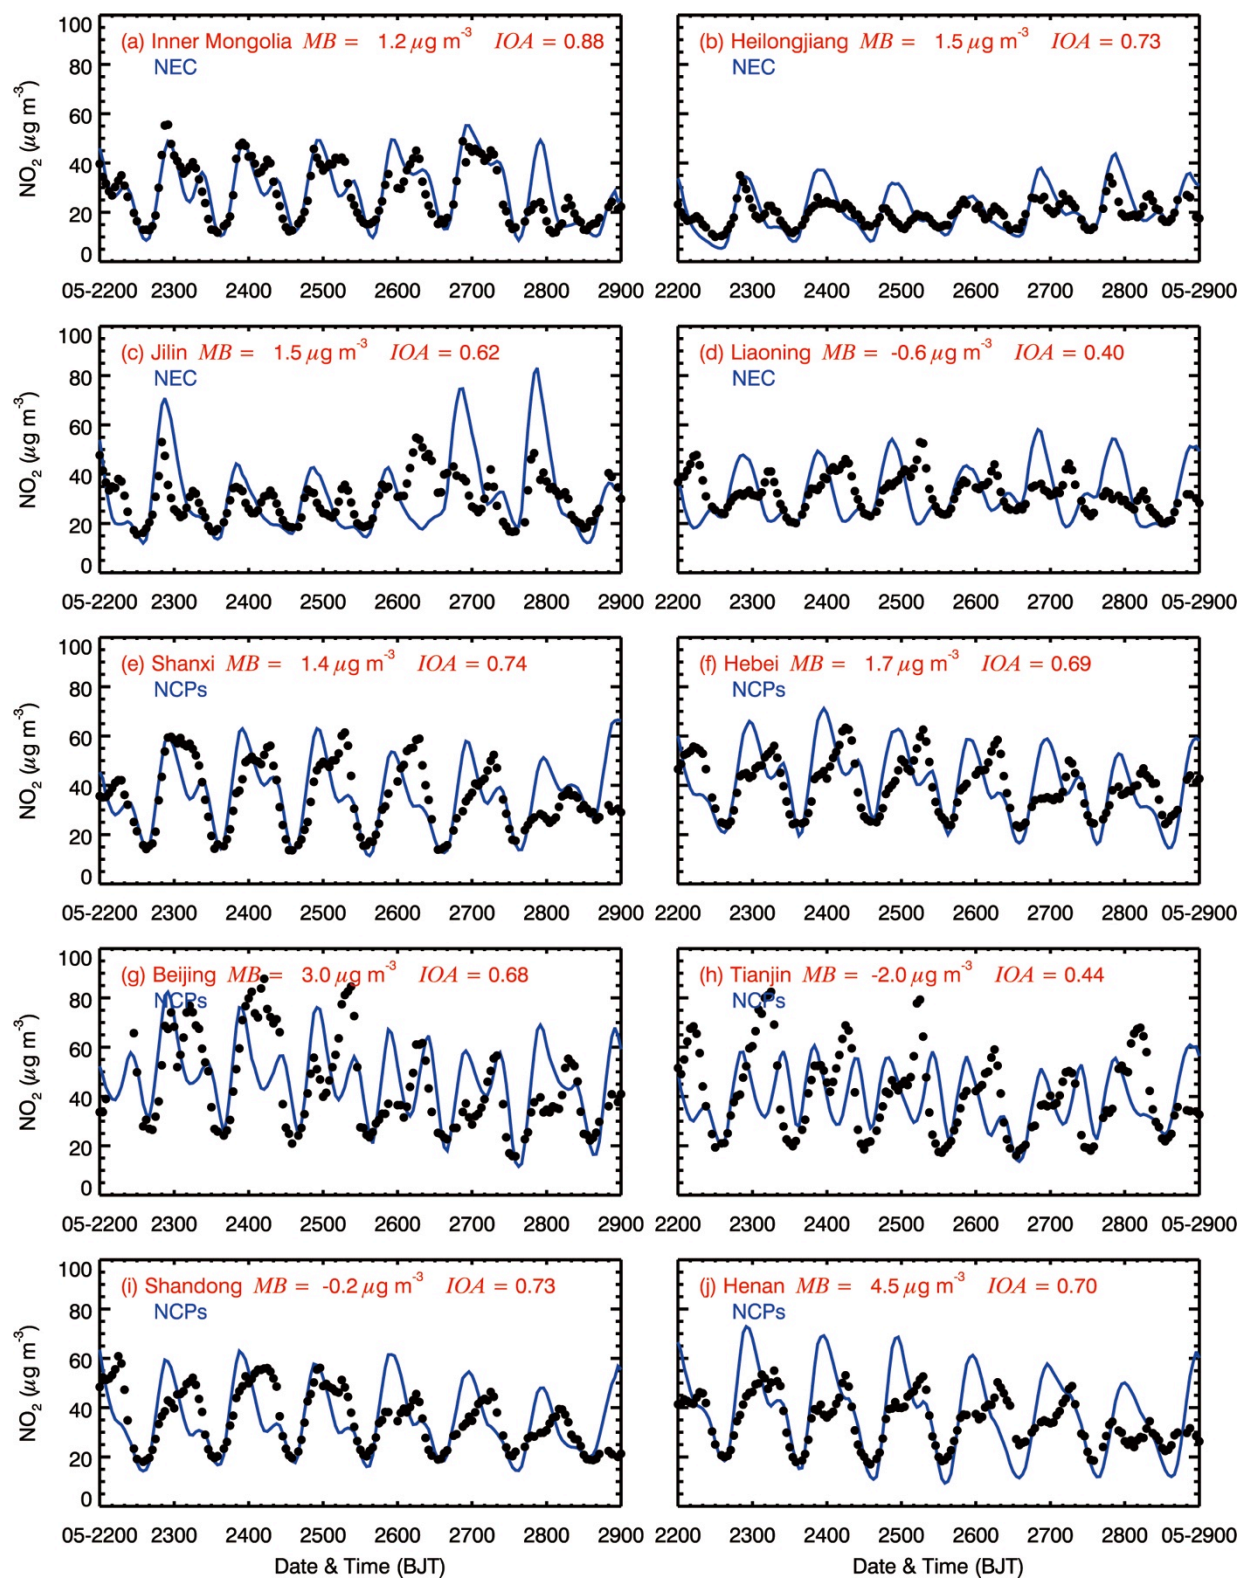

Fig. S4 Comparison of measured (black dots) and predicted (blue line) diurnal profiles of near-surface  $\text{NO}_2$  averaged over all ambient monitoring stations in provinces of Eastern China from 22 to 28 May 2015.

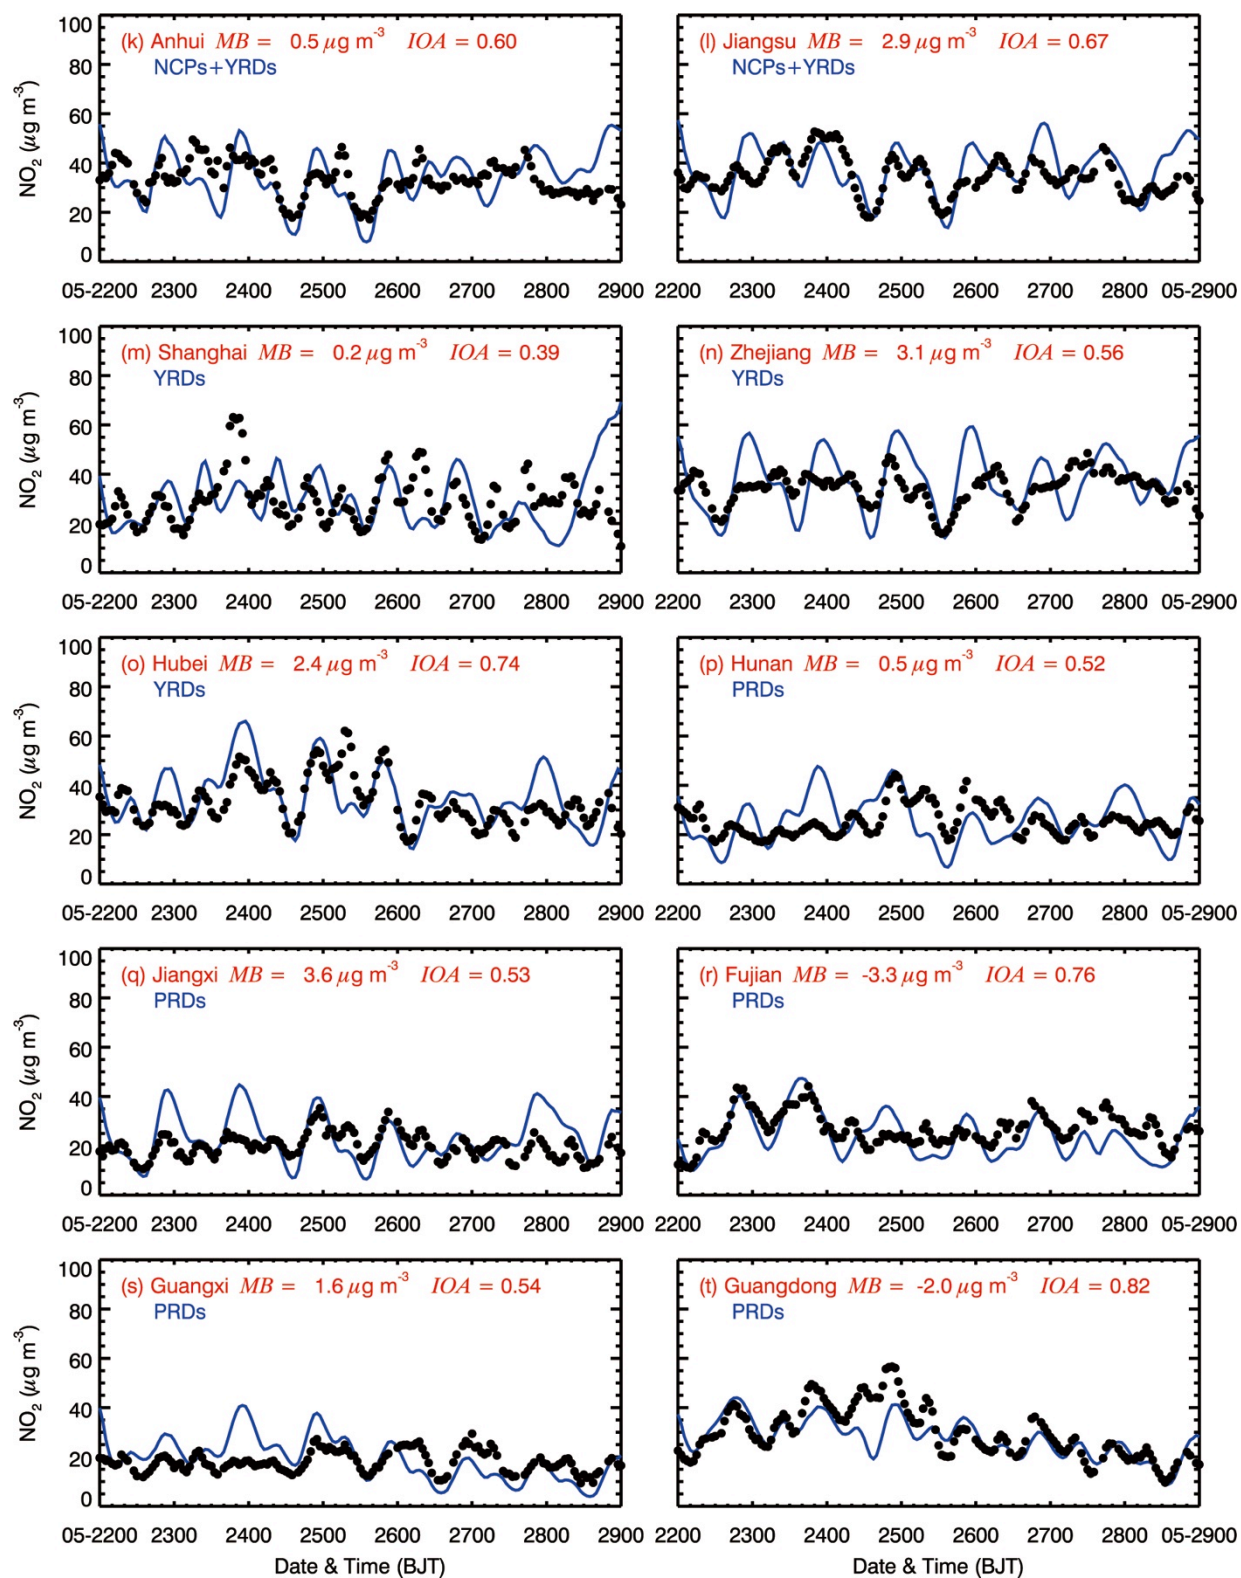

Fig. S4 Continued.
